# Supplementary material
Source: PubMed Central journal article supplement (PMC4560623)

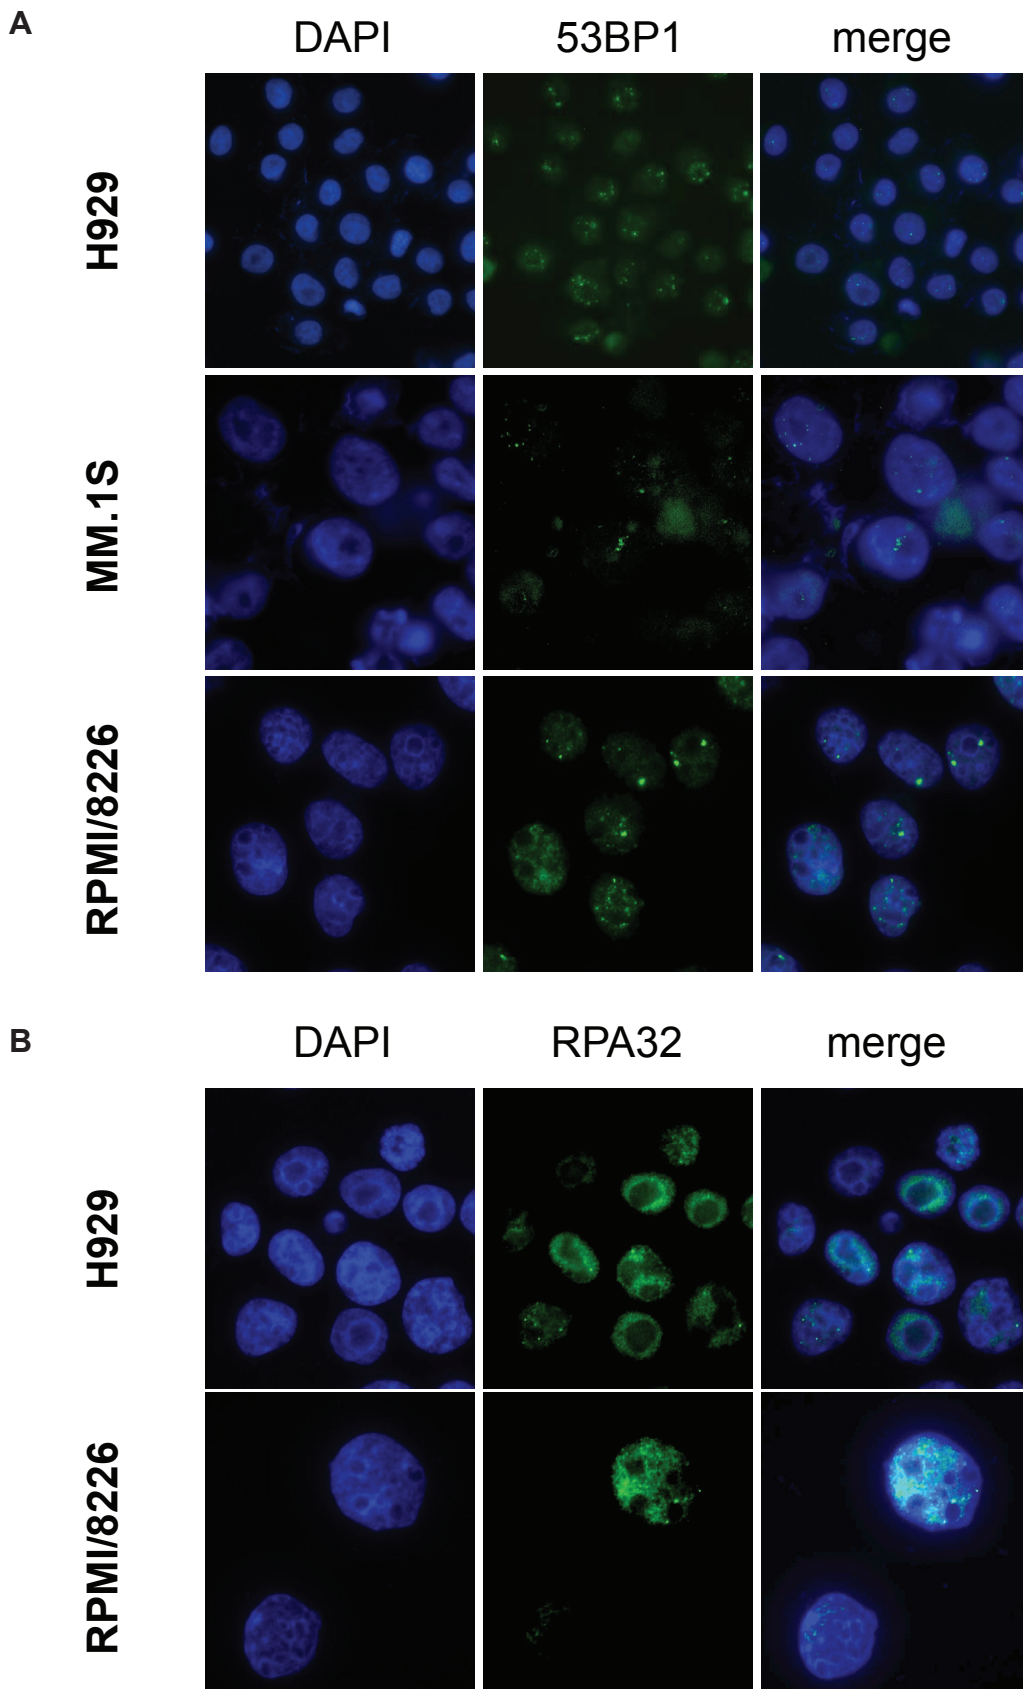

**A**

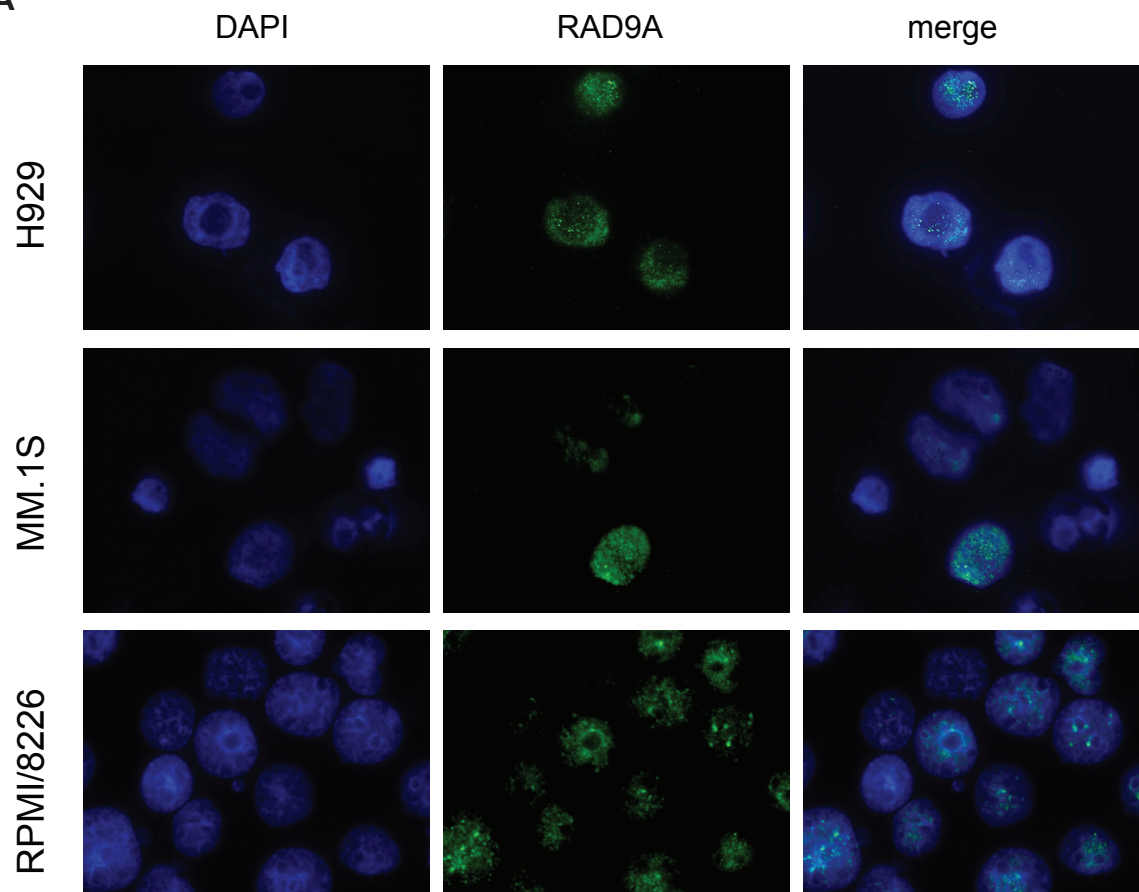

**B**

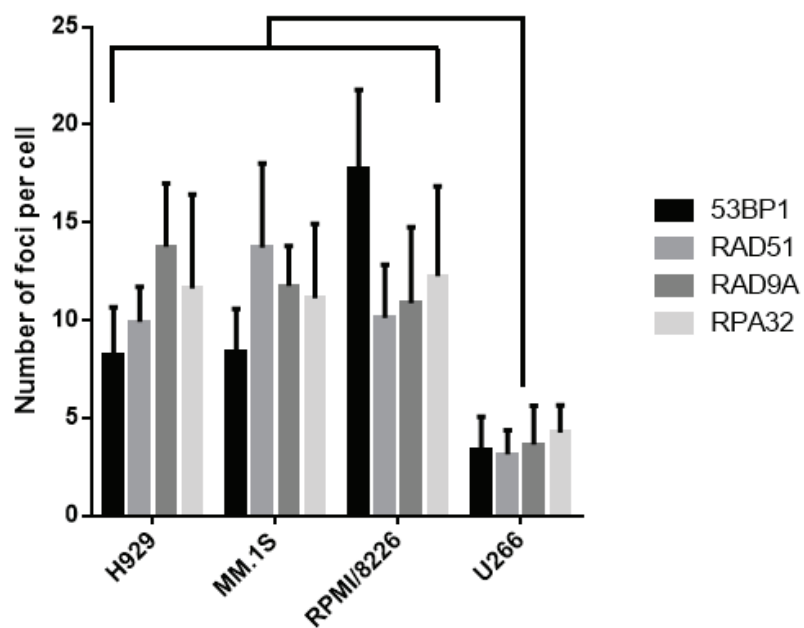

### PBMCs

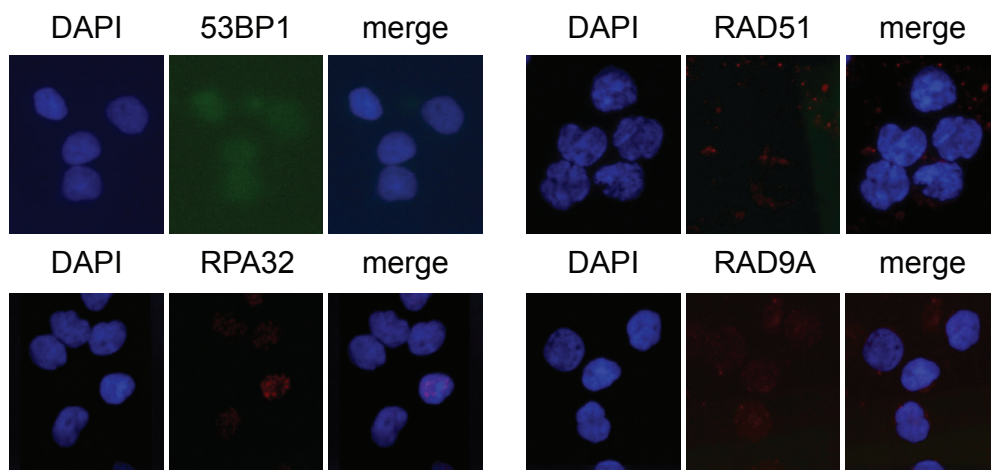

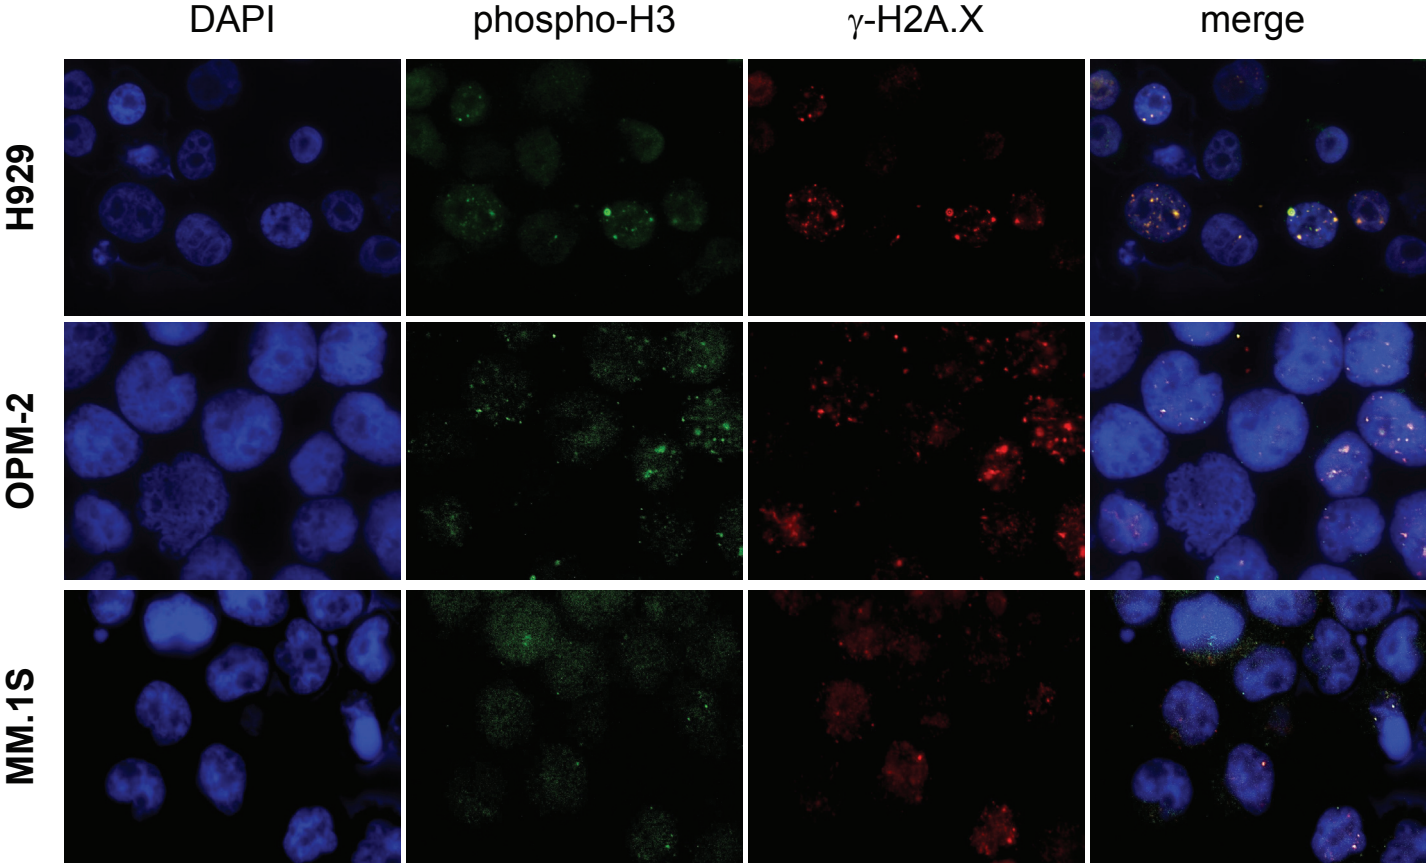

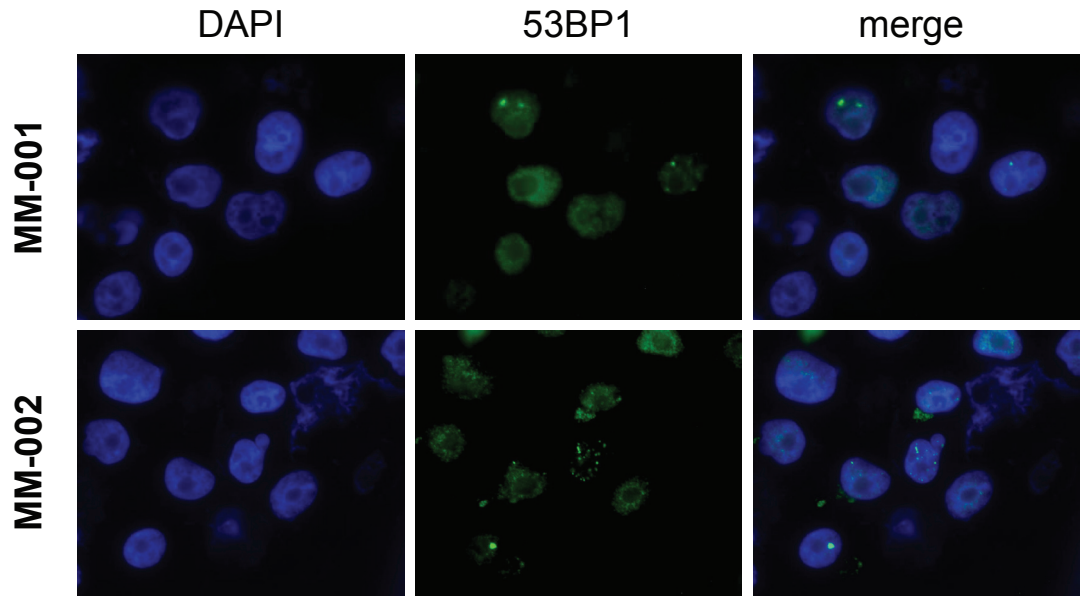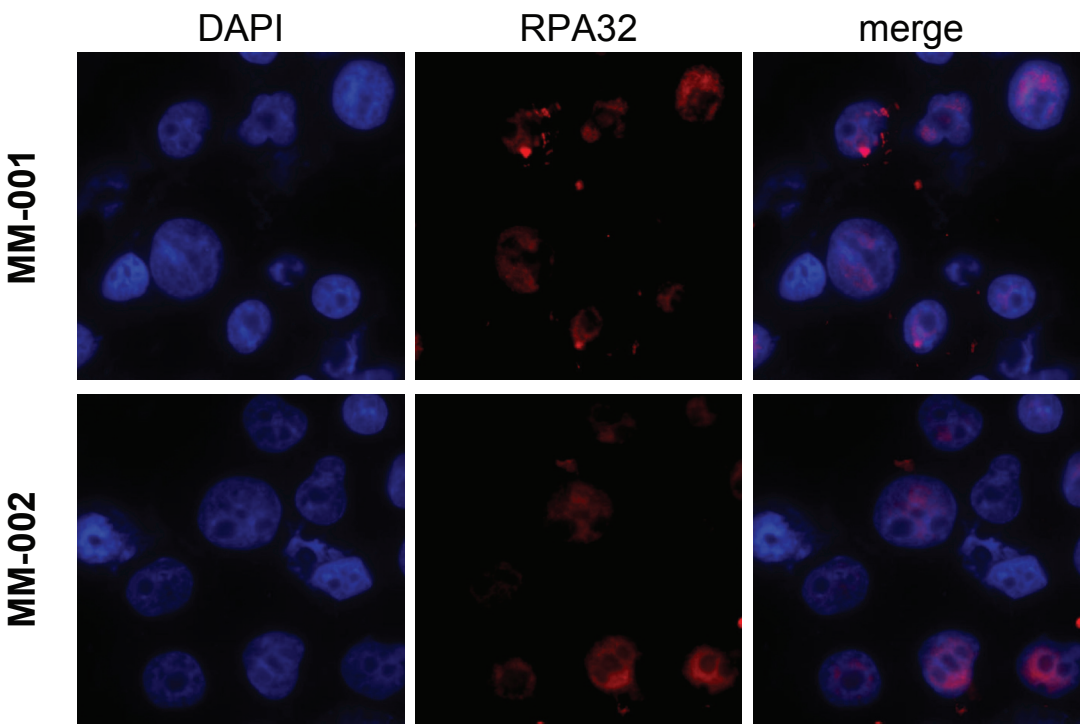

**A**

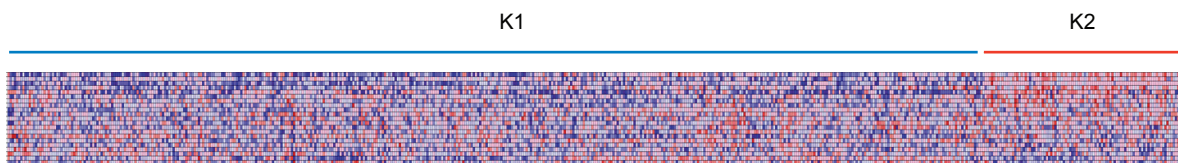

**B**

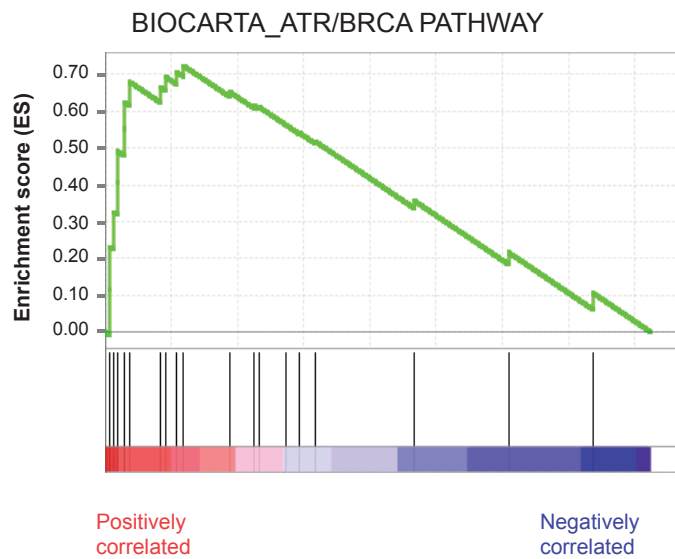

**C**

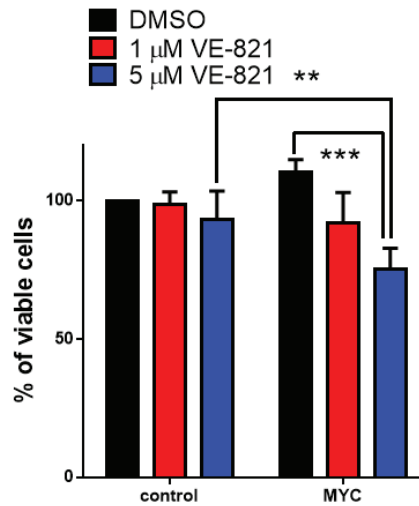

**A**

K1

K2

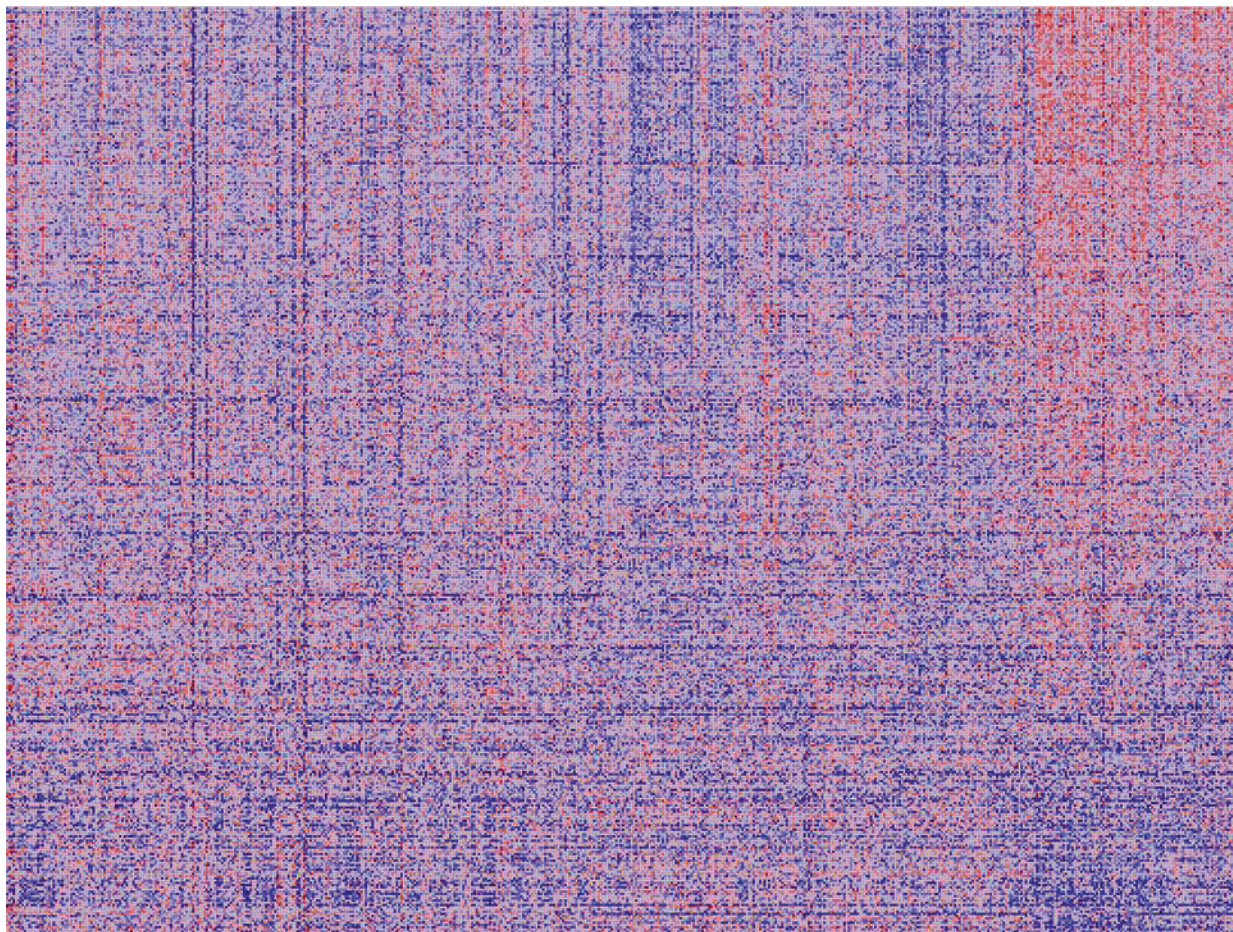

**B**

K1

K2

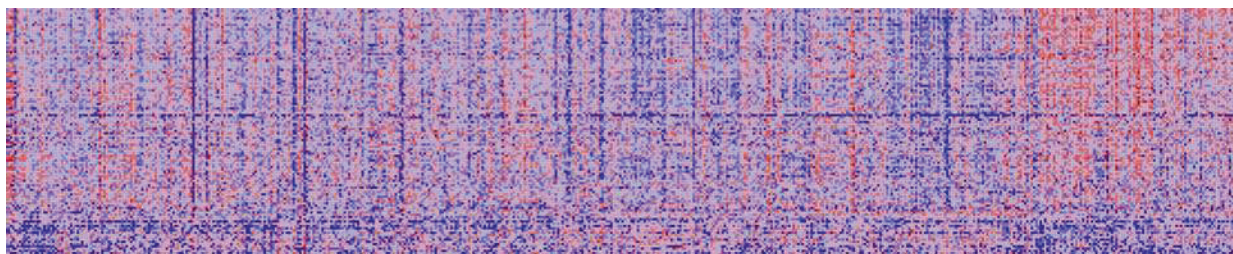

**C**

K1

K2

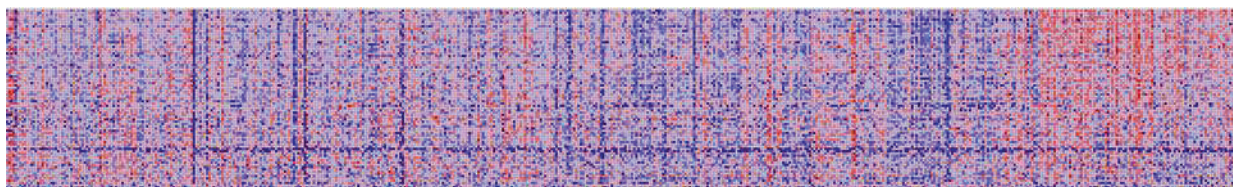

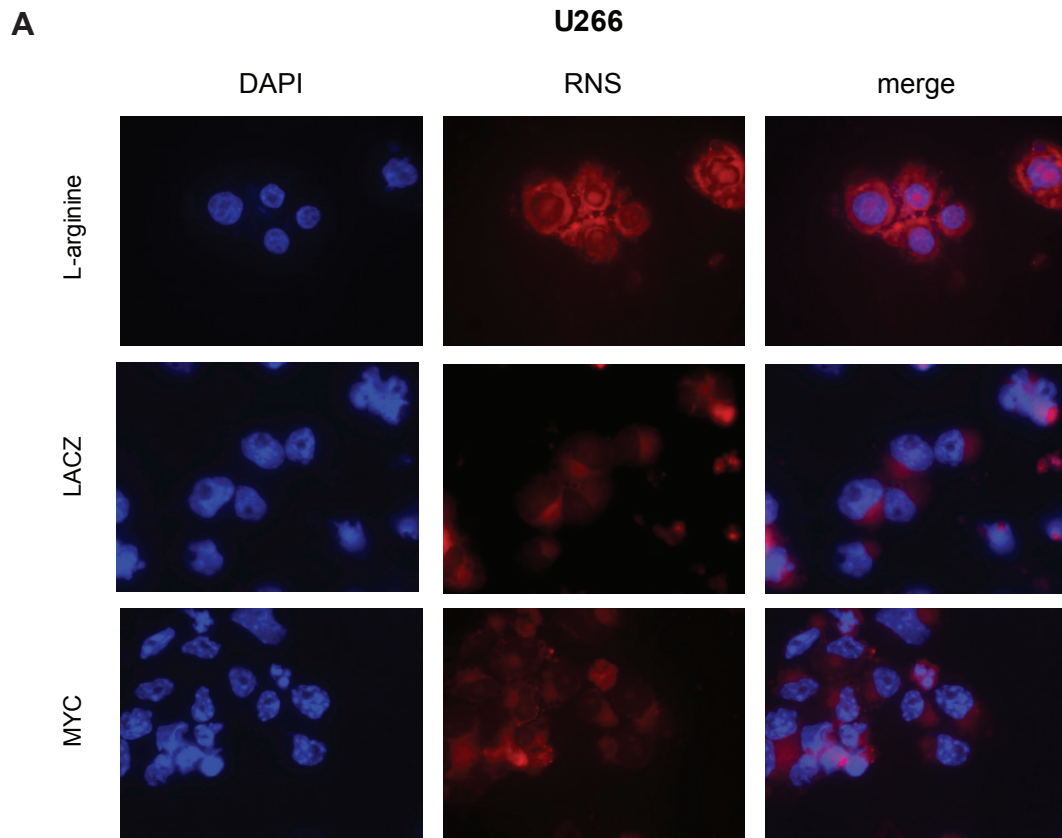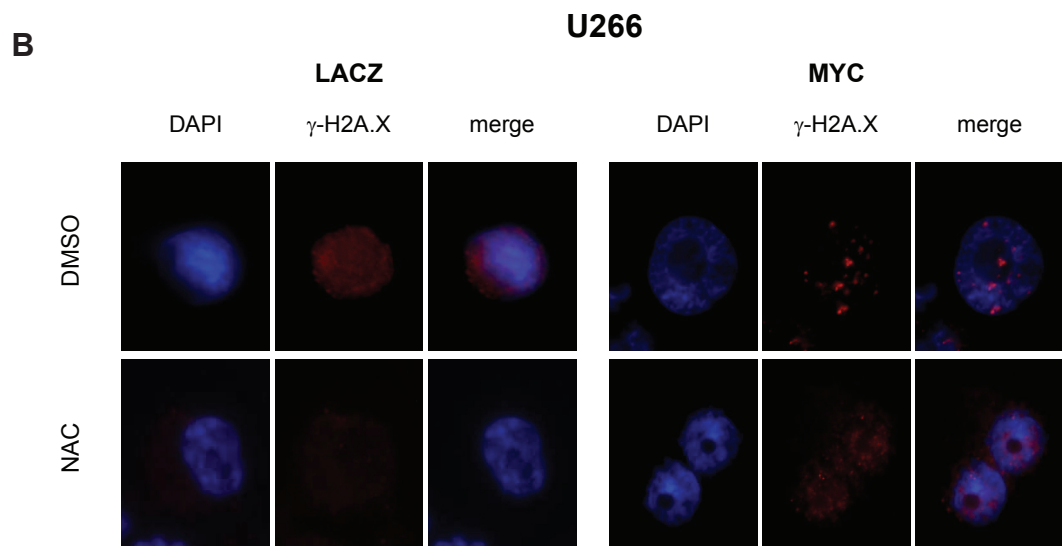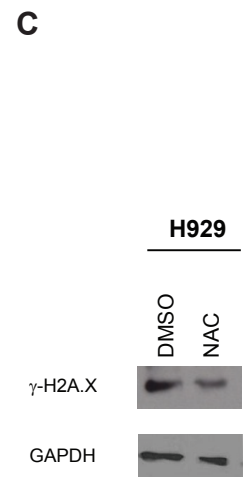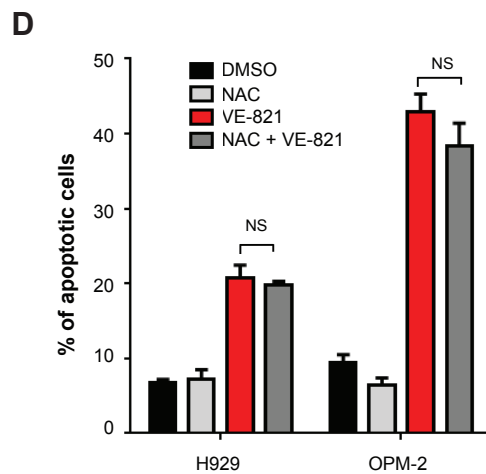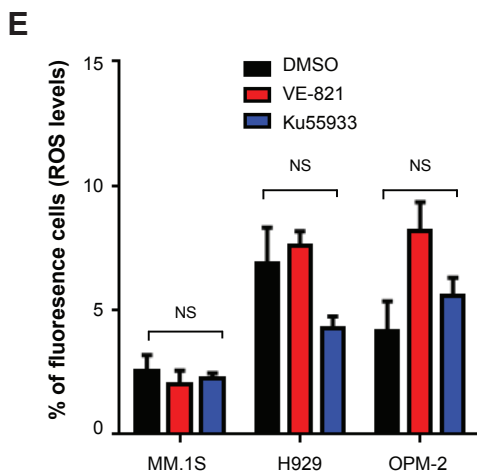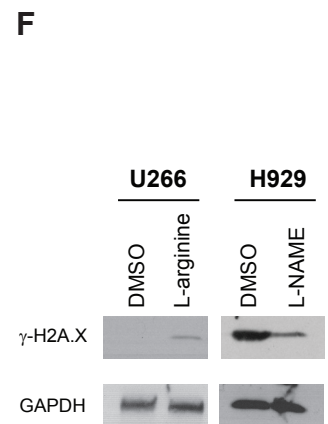



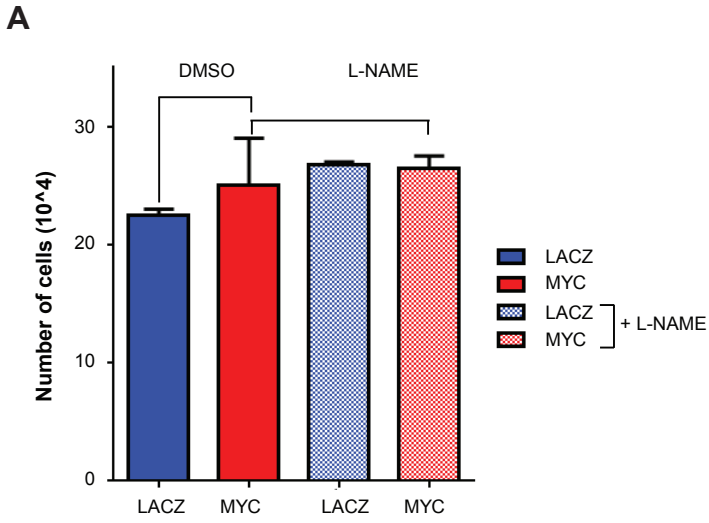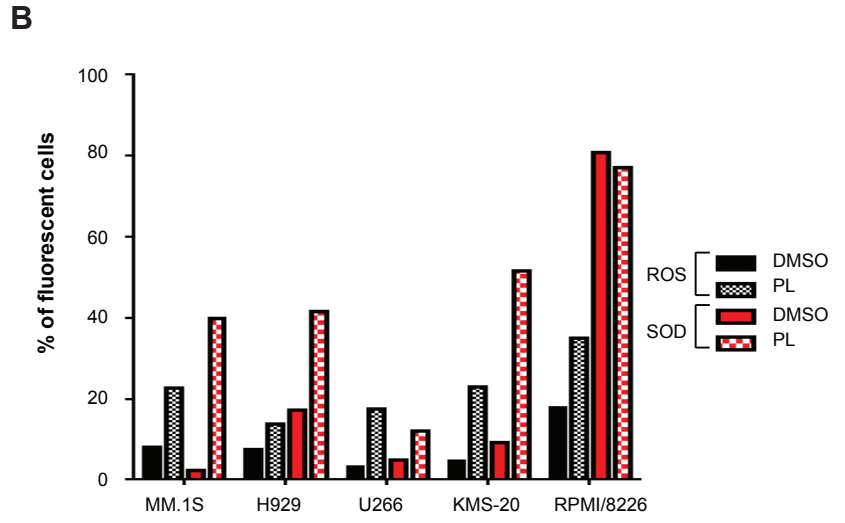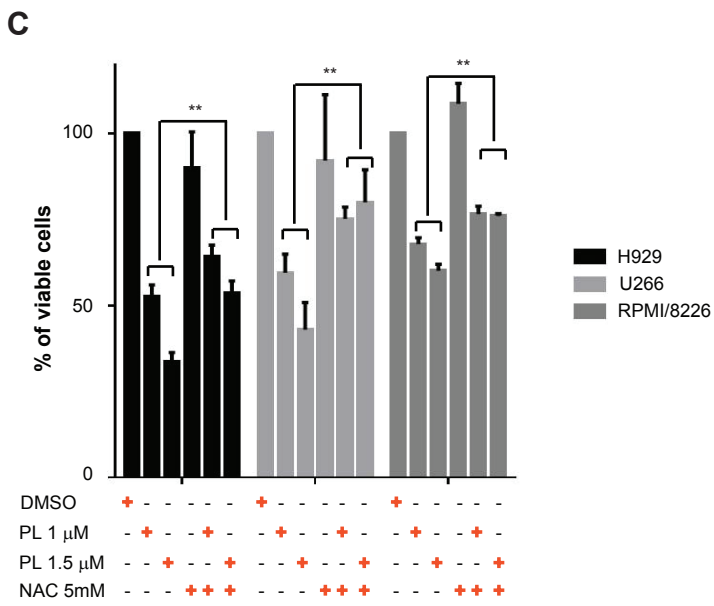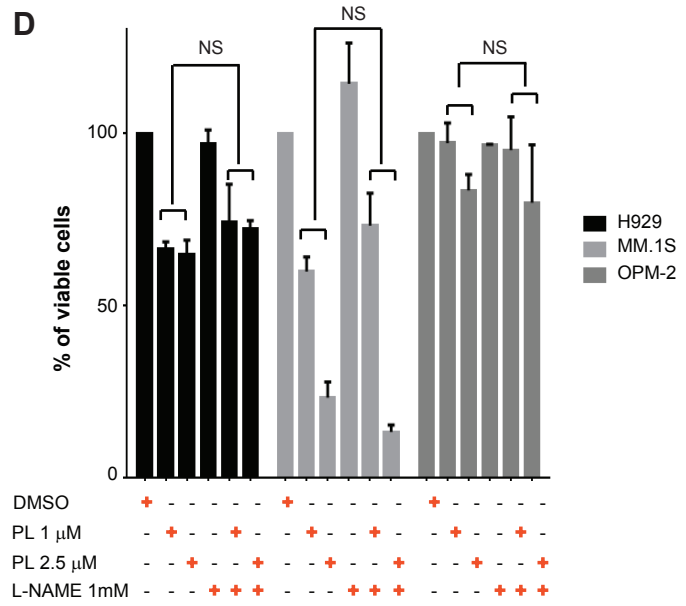

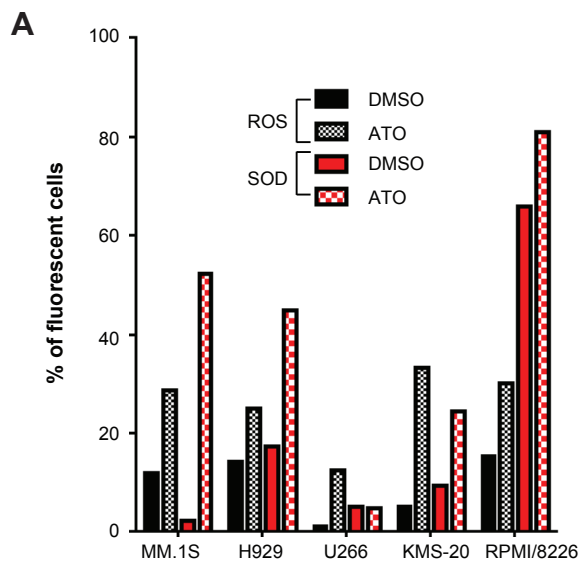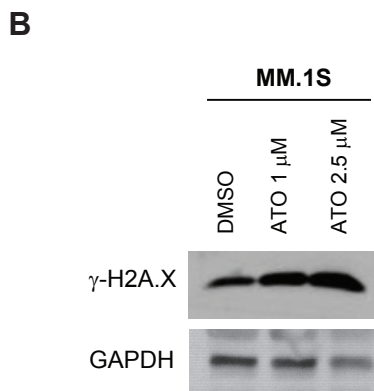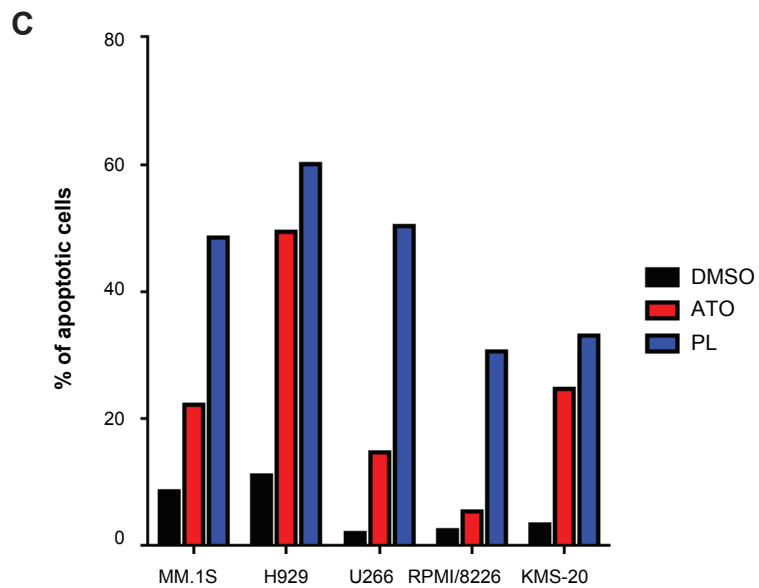

**A**

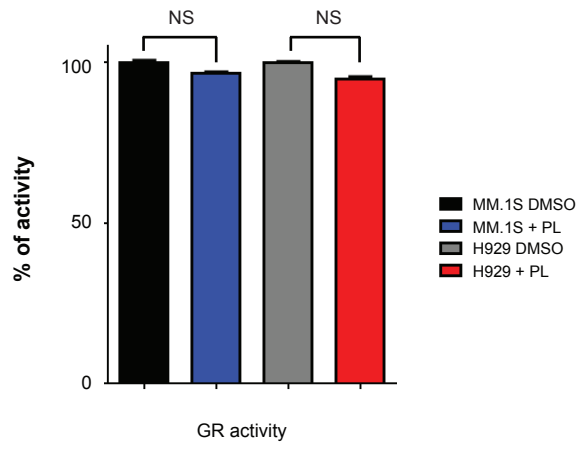

**B**

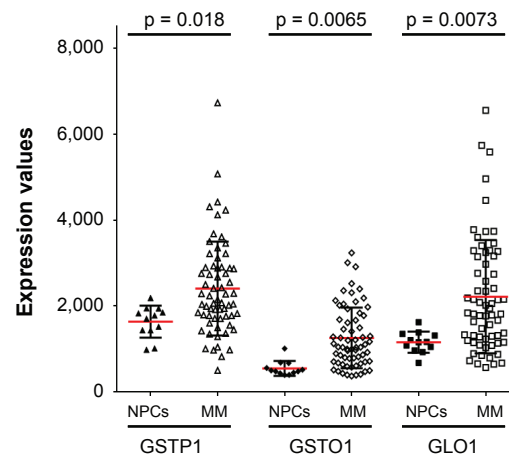

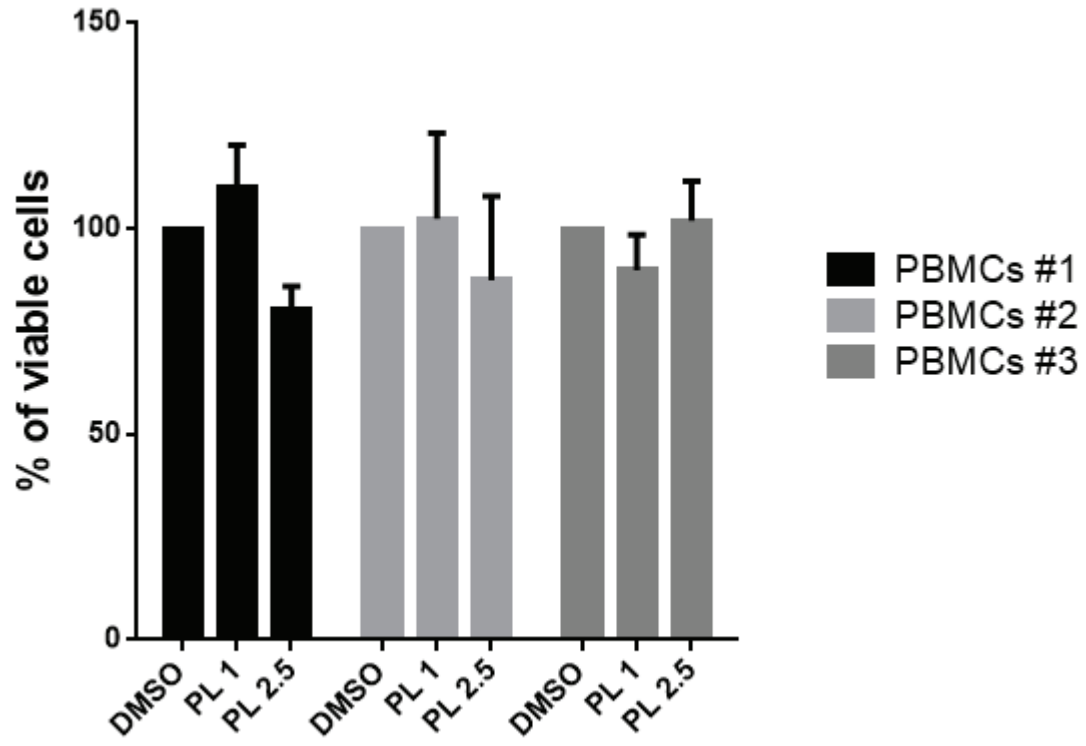

**A**

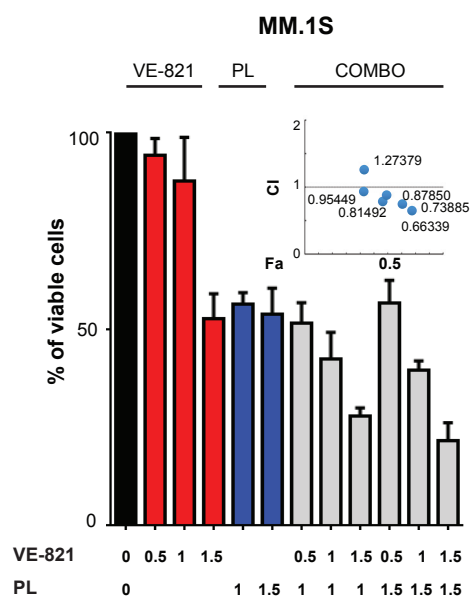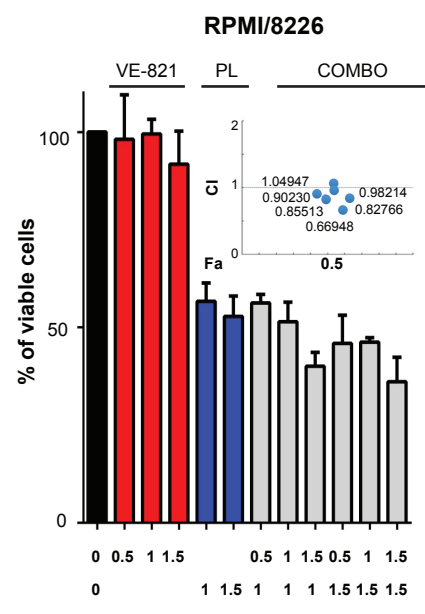

**B**

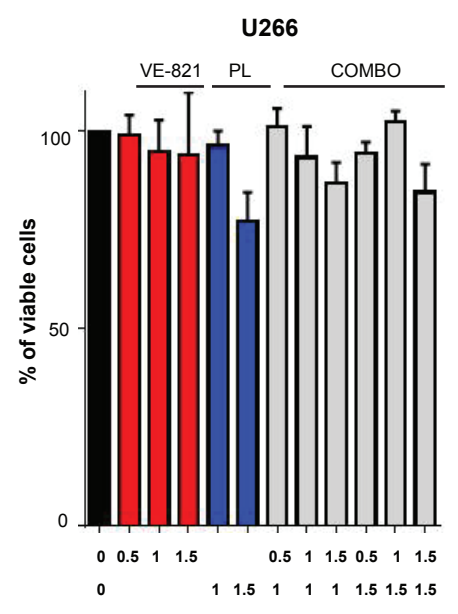

**MM.1S**

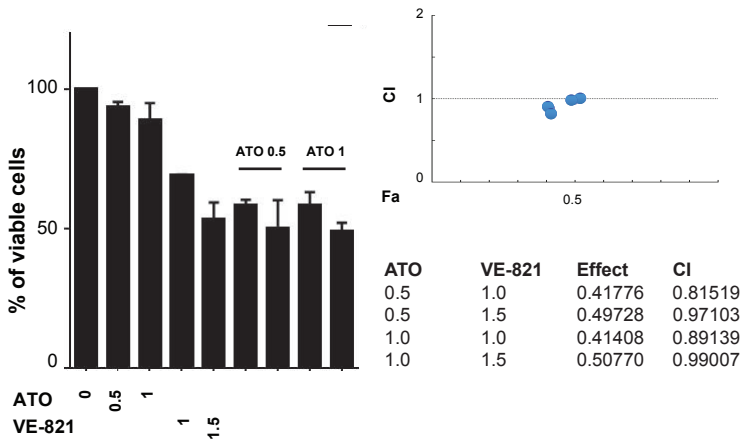

**H929**

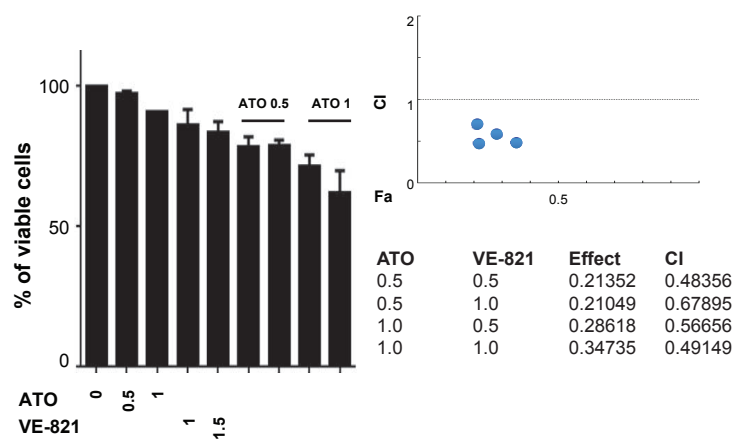

**RPMI/8226**

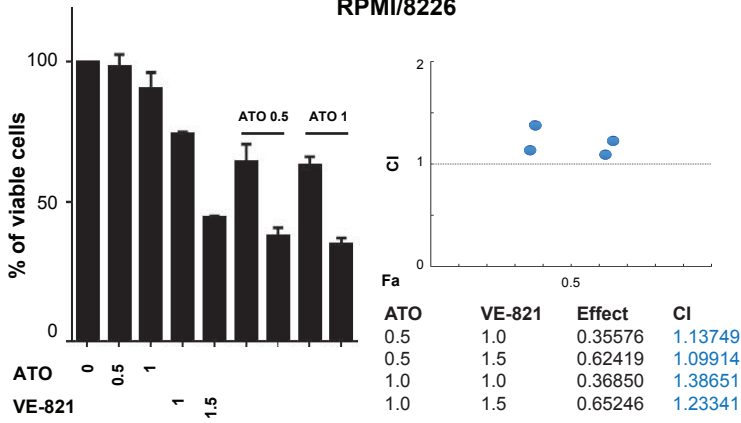

**KMS-20**

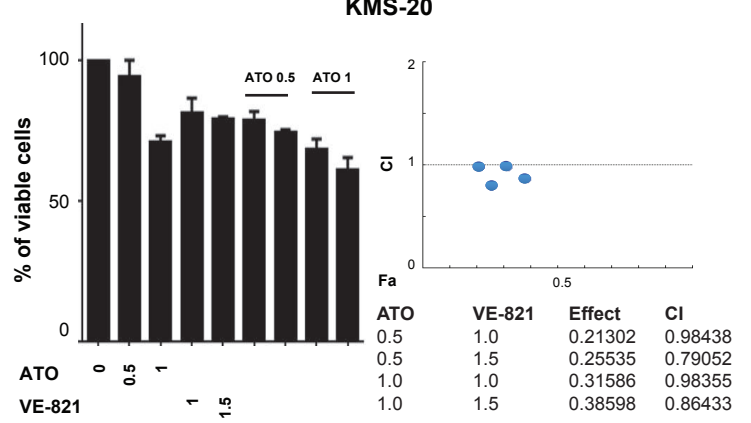

**A**

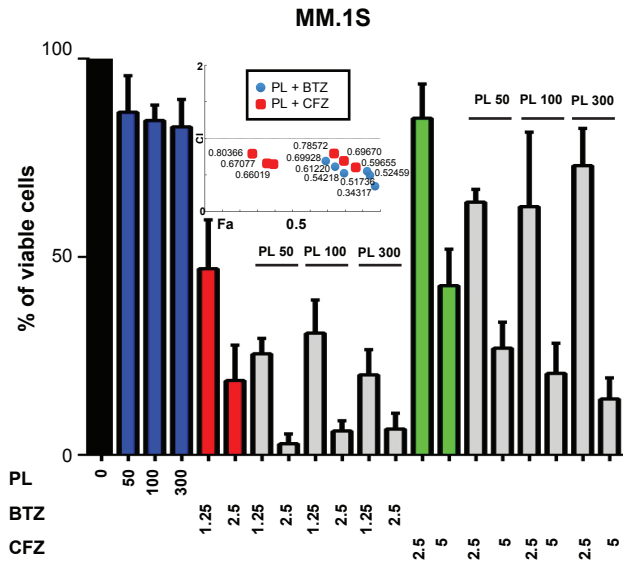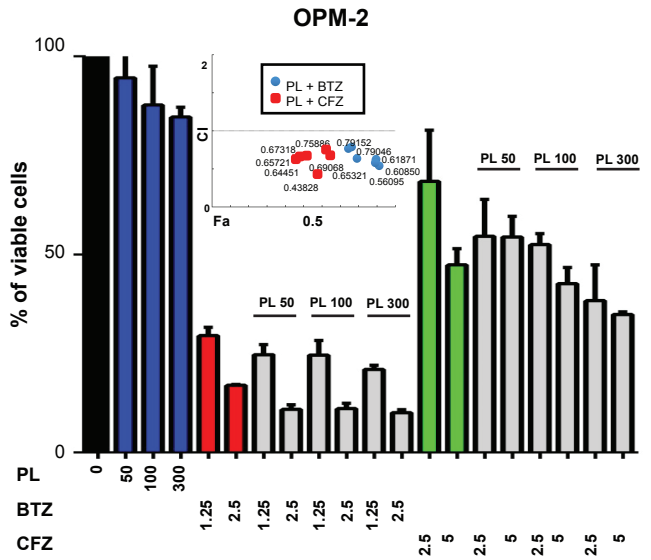

**B**

**U266**

| BTZ (nM) | PL (nM) | Effect  | CI      |
|----------|---------|---------|---------|
| 1.25     | 50      | 0.55746 | 1.72570 |
| 1.25     | 100     | 0.48332 | 2.22177 |
| 1.25     | 300     | 0.55854 | 2.51657 |
| 2.5      | 50      | 0.66327 | 2.59862 |
| 2.5      | 100     | 0.67887 | 2.61600 |
| 2.5      | 300     | 0.72243 | 2.73544 |

  

| CFZ (nM) | PL (nM) | Effect  | CI      |
|----------|---------|---------|---------|
| 2.5      | 50      | 0.38879 | 1.35524 |
| 2.5      | 100     | 0.26583 | 2.10934 |
| 2.5      | 300     | 0.30965 | 3.14531 |
| 5        | 50      | 0.47142 | 2.12826 |
| 5        | 100     | 0.55329 | 2.00876 |
| 5        | 300     | 0.63855 | 1.49490 |

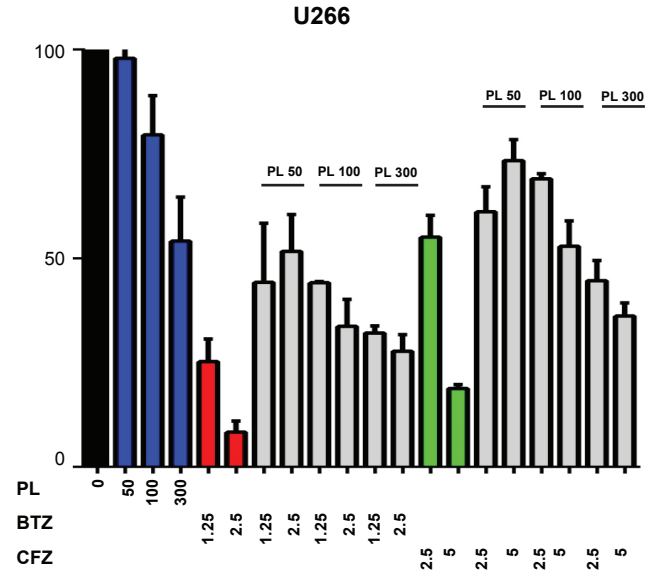

**C**

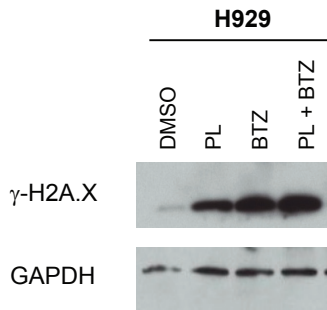

**RPMI/8226**

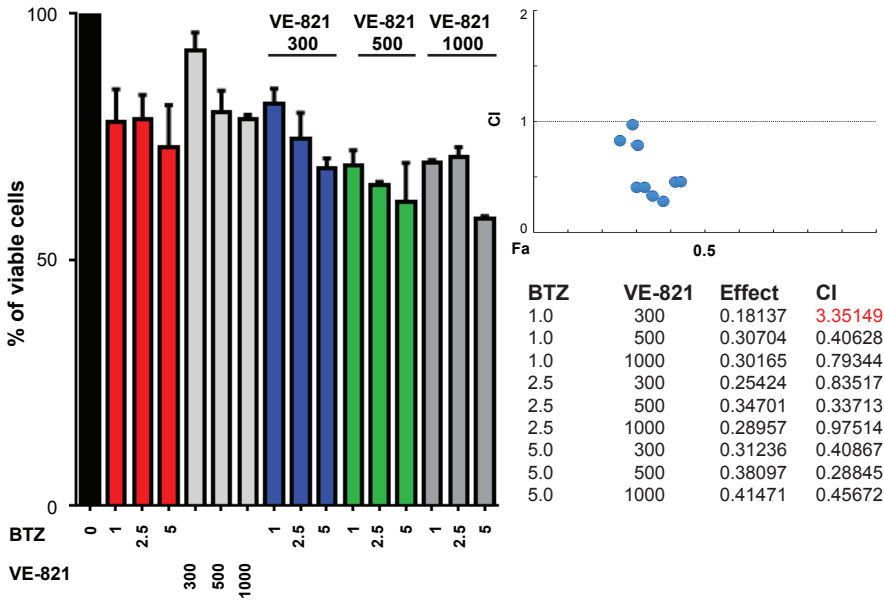

**MM.1S**

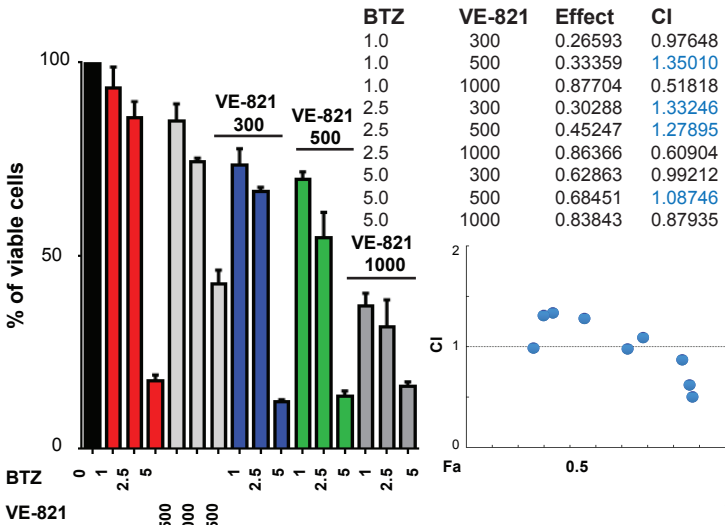

**H929**

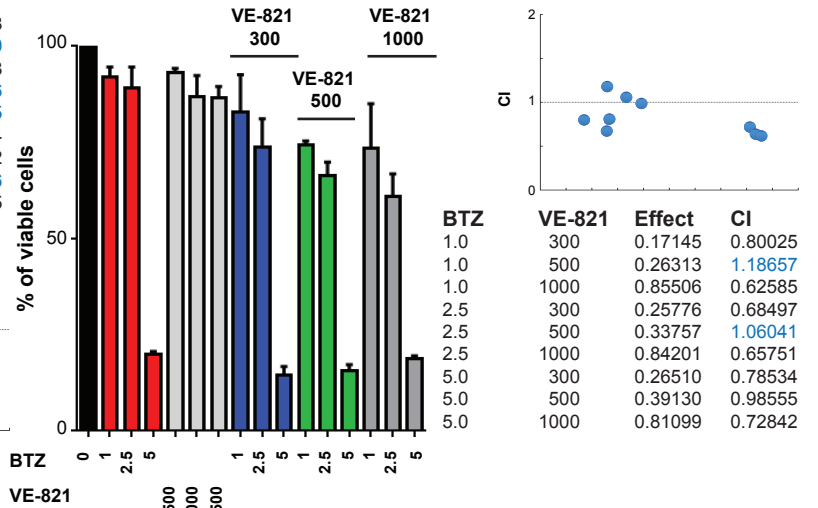

Supplement: NIHMS701558-supplement-2.pdf [file NIHMS701558-supplement-2.pdf]
